## Opinions

# Dissecting the *WRKY* Web of Plant Defense Regulators

Thomas Eulgem

During the past ten years, a large body of circumstantial evidence has accumulated, implicating WRKY factors in transcriptional reprogramming during plant immune responses [1–3]. Encoded by complex gene families in higher plants [4], these transcription factors share a DNA-binding domain (WRKY domain) comprising approximately 60 amino acids [5]. Additional conserved features of WRKYs are limited to separate subgroups of this family and include putative leucine zippers, nuclear localization signals, calmodulin binding sites, and several domains of unknown function [5–7]. Multiple studies have demonstrated the ability of WRKYs to bind to promoters of defense-associated genes via specific interactions of their WRKY domains with pathogen response elements termed W boxes (TTGACC/T) [8–11]. Both activating and repressing effects of WRKYs and W boxes on transcription have been observed [12–14]. It has also been shown that stable and transient overexpression of several WRKYs in the model plant *Arabidopsis thaliana* (*Arabidopsis*) conveys enhanced resistance to various bacterial or fungal pathogens [15–17].

The majority of the 74 *Arabidopsis* WRKY genes are transcriptionally inducible upon pathogen infection and other defense-related stimuli [18,19]. Interestingly, WRKY promoters are typically enriched for W boxes, thereby pointing to the existence of intricate regulatory circuits wherein functionally interconnected members of this family reside [19]. Indeed, multiple studies have revealed interactions of WRKYs with either their own promoters or those of other family members, suggesting that these transcription factors extensively engage in auto- and cross-regulation [9,12,13,20]. Such a WRKY web may ensure fast and efficient signal amplification. It may also allow for a tighter control in limiting the extent of defense responses via negative feedback mechanisms.

A central component of the transcriptional network activated during immune responses in *Arabidopsis* is Nonexpresser of Pathogenesis-Related genes 1 (NPR1) [21]. This transcriptional cofactor is required for several different types of plant immune responses, including basal defense and systemic acquired resistance (SAR), which are dependent on the defense hormone salicylic acid (SA) [22]. Upon induction of basal defense or SAR, NPR1 is translocated from the cytosol to the nucleus where it mediates the binding of TGA basic leucine zipper protein transcription factors to their cognate promoter elements, resulting in the upregulation of a multitude of genes [23–28]. In addition, NPR1 is functionally linked to WRKYs during plant immune responses. Intriguingly, WRKYs control NPR1 expression on the one hand, while on the other hand seem to operate downstream from it [17,29,30]. Until now, the identity of WRKYs involved

in NPR1-dependent signaling branches has for the most part remained a mystery.

In contrast to WRKYs, NPR1 and TGA basic leucine zipper proteins are members of small families of only six and ten members in *Arabidopsis*, respectively. While mutant analyses have clearly proven the roles of NPR1 and several defined TGA basic leucine zipper proteins in pathogen defense [31–33], such direct genetic evidence is scarce for WRKYs. With the exception of an atypical family member (*AtWRKY52/RRS1*) [34], no WRKYs have been found to be involved in plant immune responses by mutant screens or other forward genetics approaches. In many cases, reverse genetics-based strategies to reveal biological roles of individual WRKYs using sequence-indexed *Arabidopsis* transferred DNA (T-DNA) or transposon insertion mutants have also proved to be unsuccessful in revealing defense-related phenotypes [2]. Functional redundancy among structurally related WRKY family members has been partially blamed for these experimental shortcomings [7]. In addition, in vivo roles of individual WRKYs may be limited to defined branches or nodes of the defense network. Hence, elimination of their function by mutation may result in quite specific or subtle phenotypes. Therefore, a major challenge in dissecting the WRKY web appears to be accurately pinpointing each WRKY's sphere of activity prior to mutant analyses. This would narrow the choice of defense phenotypes to examine and may allow for the selection of appropriate candidates for double or higher-order mutant analyses.

In a study published in this issue of *PLoS Pathogens*, Wang et al. succeeded in applying such a strategic approach [35]. A cleverly designed microarray experiment uncovered several WRKY genes that are direct transcriptional targets of NPR1. Wang and colleagues profiled transcriptome changes in transgenic *Arabidopsis* plants overexpressing an NPR1-GR (glucocorticoid receptor) fusion protein in an *npr1* mutant background. Combined application of SA and the synthetic glucocorticoid dexamethasone activated the NPR1 pathway and triggered translocation of NPR1-GR to nuclei. By

**Editor:** Marianne Manchester, Scripps Research Institute, United States of America

**Citation:** Eulgem T (2006) Dissecting the WRKY web of plant defense regulators. *PLoS Pathog* 2(11): e126. doi:10.1371/journal.ppat.0020126

**Copyright:** © 2006 Thomas Eulgem. This is an open-access article distributed under the terms of the Creative Commons Attribution License, which permits unrestricted use, distribution, and reproduction in any medium, provided the original author and source are credited.

**Abbreviations:** *Arabidopsis*, *Arabidopsis thaliana*; GR, glucocorticoid receptor; NPR1, nonexpresser of pathogenesis-related genes 1; SA, salicylic acid; SAR, systemic acquired resistance; T-DNA, transferred DNA

Thomas Eulgem is at the Center for Plant Cell Biology, Department of Botany and Plant Sciences, University of California Riverside, Riverside, California, United States of America. E-mail: thomas.eulgem@ucr.edu

simultaneously blocking protein biosynthesis with cycloheximide, Wang and colleagues eliminated transcription of indirect NPR1 targets (see also [36]). Among transcripts that are directly upregulated by NPR1-dependent mechanisms they found eight encoding WRKYs. Subsequent analysis of known *npr1* phenotypes using single and double T-DNA mutants of most of these candidates confirmed their roles in NPR1 signaling.

These experiments established AtWRKY18 as a positive regulator of basal defense and SAR operating downstream from NPR1. Two previous studies had already implicated this family member in basal defense [7,16]. Overexpression of AtWRKY18 in both studies supported its role as a positive defense regulator. However, findings by Xu et al. using the same *wrky18* insertion allele as Wang and colleagues (SALK\_093916) suggest that it represses basal defense [7]. This discrepancy may have arisen from differences in experimental conditions. Also, protein-protein interaction studies have suggested that a complex interplay between AtWRKY18 and two structurally related family members, AtWRKY40 and AtWRKY60, modulates their function [7]. These three WRKYs can form homodimers or heterodimers via N-terminal leucine zippers, a feature conserved among them. Differential formation of different types of WRKY dimers may widen the spectrum of AtWRKY18 functions and may allow this regulator to act both as an activator and repressor of defense reactions.

Additional direct targets of NPR1 examined by Wang et al. are *AtWRKY53*, *AtWRKY54*, and *AtWRKY70*. These three WRKYs are structurally closely related to each other and distinct from AtWRKY18. While the *AtWRKY54* and *AtWRKY70* proteins show the highest degree of sequence similarity, the *AtWRKY53* and *AtWRKY70* genes exhibit strongly correlated expression during SAR. None of the single mutants of these three genes examined by Wang and colleagues showed altered disease resistance. However, combined insertions in the coexpressed *AtWRKY53* and *AtWRKY70* genes resulted in a moderate but significant reduction of basal defense to virulent *Pseudomonas syringae* bacteria, suggesting partially overlapping functions of these two genes. Consistent with this finding, recent studies by Li et al. as well as Knoth et al. have demonstrated roles of *AtWRKY70* in SA-mediated basal defense to the biotrophic fungus *Erysiphe cichoracearum* and the oomycete *Hyaloperonospora parasitica*, respectively [37,38]. The study by Knoth et al. extended roles of this WRKY to SA-dependent gene-for-gene resistance [38]. In addition, *AtWRKY70* was also shown to be required for defense to the fungal necrotroph *Botrytis cinerea* [39]. Although resistance to necrotrophs is typically mediated by SA-independent signaling mechanisms, *AtWRKY70* appears to be transcriptionally upregulated by an SA-dependent pathway in response to *B. cinerea* infections. Hence, a common theme regarding the function of *AtWRKY70* seems to be its requirement for SA-mediated defenses.

Furthermore, Wang and coworkers found that *AtWRKY70* contributes to a second NPR1-mediated function, which is suppression of SA accumulation [35]. In untreated *Arabidopsis* tissues, SA concentrations are low but increase to high levels after pathogen infection. NPR1 limits the extent of SA accumulation. The tested *wrky70* single mutant exhibited markedly enhanced levels of SA in untreated plants. This

effect is more pronounced in a *wrky70/wrky54* double mutant, which also allowed SA to accumulate to an even higher level after pathogen infection. Hence, the structurally closely related AtWRKY70 and AtWRKY54 have overlapping roles in counteracting accumulation of SA.

Finally, Wang et al. established a role of the so far elusive AtWRKY58 as a negative regulator of SAR [35]. In summary, the strategy applied by Wang and colleagues proved to be extremely successful in providing a deeper insight into the roles of WRKYs operating directly downstream from NPR1 in SA-dependent transcriptional cascades. This strategy can be modified and reiterated for a stepwise dissection of additional layers in the plant defense signaling network. Intriguingly, members of the Xinnian Dong lab have already initiated experiments to identify direct transcriptional targets of AtWRKY18 [35]. ■

## Acknowledgments

I thank Colleen Knoth and Yu-Hung (Linda) Wei for critical reading of the manuscript and helpful discussions.

**Funding.** The author received no specific funding for this article.

**Competing interests.** The author has declared that no competing interests exist.

## References

1. Rushton PJ, Torres JT, Parniske M, Wernert P, Hahlbrock K, et al. (1996) Interaction of elicitor-induced DNA-binding proteins with elicitor response elements in the promoters of parsley PR1 genes. *EMBO J* 15: 5690–5700.
2. Ulker B, Somssich IE (2004) WRKY transcription factors: From DNA binding towards biological function. *Curr Opin Plant Biol* 7: 491–498.
3. Eulgem T (2005) Regulation of the *Arabidopsis* defense transcriptome. *Trends Plant Sci* 10: 71–78.
4. Zhang Y, Wang L (2005) The WRKY transcription factor superfamily: Its origin in eukaryotes and expansion in plants. *BMC Evol Biol* 5: 1.
5. Eulgem T, Rushton PJ, Robatzek S, Somssich IE (2000) The WRKY superfamily of plant transcription factors. *Trends Plant Sci* 5: 199–206.
6. Park CY, Lee JH, Yoo JH, Moon BC, Choi MS, et al. (2005) WRKY group II transcription factors interact with calmodulin. *FEBS Lett* 579: 1545–1550.
7. Xu X, Chen C, Fan B, Chen Z (2006) Physical and functional interactions between pathogen-induced *Arabidopsis* WRKY18, WRKY40, and WRKY60 transcription factors. *Plant Cell* 18: 1310–1326.
8. Rushton PJ, Reinstadler A, Lipka V, Lippok B, Somssich IE (2002) Synthetic plant promoters containing defined regulatory elements provide novel insights into pathogen- and wound-induced signaling. *Plant Cell* 14: 749–762.
9. Turck F, Zhou A, Somssich IE (2004) Stimulus-dependent, promoter-specific binding of transcription factor WRKY1 to its native promoter and the defense-related gene PcPR1-1 in parsley. *Plant Cell* 16: 2573–2585.
10. Maeo K, Hayashi S, Kojima-Suzuki H, Morikami A, Nakamura K (2001) Role of conserved residues of the WRKY domain in the DNA-binding of tobacco WRKY family proteins. *Biosci Biotechnol Biochem* 65: 2428–2436.
11. Yamasaki K, Kigawa T, Inoue M, Tateno M, Yamasaki T, et al. (2005) Solution structure of an *Arabidopsis* WRKY DNA binding domain. *Plant Cell* 17: 944–956.
12. Eulgem T, Rushton PJ, Schmelzer E, Hahlbrock K, Somssich IE (1999) Early nuclear events in plant defence signalling: Rapid activation by WRKY transcription factors. *EMBO J* 18: 4689–4699.
13. Robatzek S, Somssich IE (2002) Targets of AtWRKY6 regulation during plant senescence and pathogen defense. *Genes Dev* 16: 1139–1149.
14. Lebel E, Heifetz P, Thorne L, Uknes S, Ryals J, et al. (1998) Functional analysis of regulatory sequences controlling PR-1 gene expression in *Arabidopsis*. *Plant J* 16: 223–233.
15. Asai T, Tena G, Plotnikova J, Willmann MR, et al. (2002) MAP kinase signalling cascade in *Arabidopsis* innate immunity. *Nature* 415: 977–980.
16. Chen C, Chen Z (2002) Potentiation of developmentally regulated plant defense response by AtWRKY18, a pathogen-induced *Arabidopsis* transcription factor. *Plant Physiol* 129: 706–716.
17. Li J, Brader G, Palva ET (2004) The WRKY70 transcription factor: A node of convergence for jasmonate-mediated and salicylate-mediated signals in plant defense. *Plant Cell* 16: 319–331.
18. Kalde M, Barth M, Somssich IE, Lippok B (2003) Members of the *Arabidopsis* WRKY group III transcription factors are part of different plant defense signaling pathways. *Mol Plant Microbe Interact* 16: 295–305.

19. Dong J, Chen C, Chen Z (2003) Expression profiles of the *Arabidopsis* WRKY gene superfamily during plant defense response. *Plant Mol Biol* 51: 21–37.
20. Cormack RS, Eulgem T, Rushton PJ, Kochner P, Hahlbrock K, et al. (2002) Leucine zipper-containing WRKY proteins widen the spectrum of immediate early elicitor-induced WRKY transcription factors in parsley. *Biochim Biophys Acta* 1576: 92–100.
21. Dong X (2004) NPR1, all things considered. *Curr Opin Plant Biol* 7: 547–552.
22. Pieterse CM, Van Loon LC (2004) NPR1: The spider in the web of induced resistance signaling pathways. *Curr Opin Plant Biol* 7: 456–464.
23. Zhou JM, Trifa Y, Silva H, Pontier D, Lam E, et al. (2000) NPR1 differentially interacts with members of the TGA/OBF family of transcription factors that bind an element of the PR-1 gene required for induction by salicylic acid. *Mol Plant Microbe Interact* 15: 191–202.
24. Zhang Y, Fan W, Kinkema M, Li X, Dong X (1999) Interaction of NPR1 with basic leucine zipper protein transcription factors that bind sequences required for salicylic acid induction of the PR-1 gene. *Proc Natl Acad Sci U S A* 96: 6523–6528.
25. Despres C, DeLong C, Glaze S, Liu E, Fobert PR (2000) The *Arabidopsis* NPR1/NIM1 protein enhances the DNA binding activity of a subgroup of the TGA family of bZIP transcription factors. *Plant Cell* 12: 279–290.
26. Kinkema M, Fan W, Dong X (2000) Nuclear localization of NPR1 is required for activation of PR gene expression. *Plant Cell* 12: 2339–2350.
27. Mou Z, Fan W, Dong X (2003) Inducers of plant systemic acquired resistance regulate NPR1 function through redox changes. *Cell* 113: 935–944.
28. Thibaud-Nissen F, Wu H, Richmond T, Redman JC, Johnson C, et al. (2006) Development of *Arabidopsis* whole-genome microarrays and their application to the discovery of binding sites for the TGA2 transcription factor in salicylic acid-treated plants. *Plant J* 47: 152–162.
29. Yu D, Chen C, Chen Z (2001) Evidence for an important role of WRKY DNA binding proteins in the regulation of NPR1 gene expression. *Plant Cell* 13: 1527–1540.
30. Maleck K, Levine A, Eulgem T, Morgan A, Schmid J, et al. (2000) The transcriptome of *Arabidopsis thaliana* during systemic acquired resistance. *Nat Genet* 26: 403–410.
31. Cao H, Bowling SA, Gordon AS, Dong X (1994) Characterization of an *Arabidopsis* mutant that is nonresponsive to inducers of systemic acquired resistance. *Plant Cell* 6: 1583–1592.
32. Delaney TP, Friedrich L, Ryals JA (1995) *Arabidopsis* signal transduction mutant defective in chemically and biologically induced disease resistance. *Proc Natl Acad Sci U S A* 92: 6602–6606.
33. Zhang Y, Tessaro MJ, Lassner M, Li X (2003) Knockout analysis of *Arabidopsis* transcription factors TGA2, TGA5, and TGA6 reveals their redundant and essential roles in systemic acquired resistance. *Plant Cell* 15: 2647–2653.
34. Deslandes L, Olivier J, Theulieries F, Hirsch J, Feng DX, et al. (2002) Resistance to *Ralstonia solanacearum* in *Arabidopsis thaliana* is conferred by the recessive RRS1-R gene, a member of a novel family of resistance genes. *Proc Natl Acad Sci U S A* 99: 2404–2409.
35. Wang D, Amornsiripanitch N, Dong X (2006) A genomic approach to identify regulatory nodes in the transcriptional network of systemic acquired resistance in plants. *PLoS Pathog* 2: doi:10.1371/journal.ppat.0020123.
36. Wang D, Weaver ND, Kesarwani M, Dong X (2005) Induction of protein secretory pathway is required for systemic acquired resistance. *Science* 308: 1036–1040.
37. Li J, Brader G, Kariola T, Palva ET (2006) WRKY70 modulates the selection of signaling pathways in plant defense. *Plant J* 46: 477–491.
38. Knoth C, Ringler J, Dangl J, Eulgem T (2006) *Arabidopsis* WRKY70 is required for full RPP4-mediated disease resistance and basal defense against *Hyaloperonospora parasitica*. *Mol Plant Microbe Interact*. In press.
39. AbuQamar S, Chen X, Dhawan R, Bluhm B, Salmeron J, et al. (2006) Expression profiling and mutant analysis reveals complex regulatory networks involved in *Arabidopsis* response to *Botrytis* infection. *Plant J* 48: 28–44.

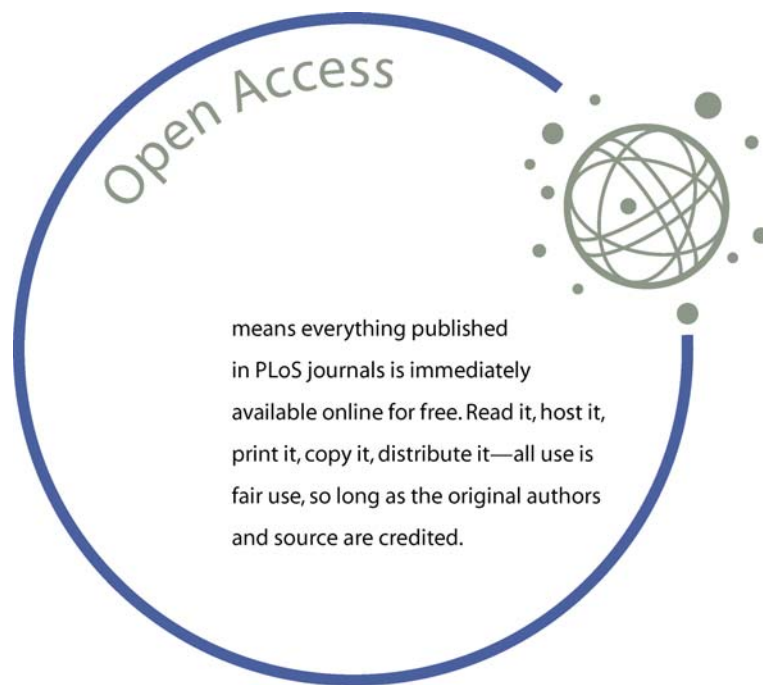

Source: https://journals.plos.org/plospathogens/article/file?id=10.1371/journal.ppat.0020126
